# Supplementary material
Source: HighWire-hosted journal article supplement (https://www.ajevonline.org/highwire/filestream/1921/field_highwire_adjunct_files/0/ajev.2014.13090_SupplementalData.pdf)
Supplement: ajev.2014.13090_SupplementalData.pdf [file ajev.2014.13090_SupplementalData.pdf]

### Supplemental Data for:

Buffon, P., H. Heymann, and D.E. Block. 2014.

Sensory and chemical effects of cross-flow filtration on white and red wines.

Am. J. Enol. Vitic. 65:305-314. doi: 10.5344/ajev.2014.13090.

**Supplemental Table 1** Wine composition for filtered white wine and filtered red wine and their respective unfiltered controls.

| Sample       | pH   | Titrateable acidity (g/L) | Ethanol (v/v%) | Malate (g/L) | Volatile acidity (g/L) | Glucose+fructose (g/L) |
|--------------|------|---------------------------|----------------|--------------|------------------------|------------------------|
| <b>White</b> |      |                           |                |              |                        |                        |
| Subsample 1  | 3.38 | 6.36                      | 12.63          | 2.274        | 0.28                   | 0.87                   |
| Subsample 2  | 3.38 | 6.39                      | 13.00          | 2.338        | 0.28                   | 0.91                   |
| Subsample 3  | 3.38 | 6.38                      | 13.03          | 2.424        | 0.27                   | 0.91                   |
| Control      | 3.40 | 6.45                      | 12.73          | 2.381        | 0.28                   | 0.92                   |
| <b>Red</b>   |      |                           |                |              |                        |                        |
| Subsample 1  | 3.75 | 5.51                      | 13.48          | 0.1688       | 0.45                   | 0.53                   |
| Subsample 2  | 3.77 | 5.48                      | 13.57          | 0.07130      | 0.45                   | 0.52                   |
| Subsample 3  | 3.77 | 5.50                      | 13.55          | 0.06897      | 0.45                   | 0.51                   |
| Control      | 3.78 | 5.46                      | 13.57          | 0.06928      | 0.46                   | 0.050                  |

**Supplemental Table 2** Mean color values including absorbance at 420 nm, absorbance at 520 nm, density, and hue for three filtered white wine subsamples and an unfiltered control. Each value is an average of eight time points and three technical repetitions (n = 24).

| Product     | A420                  | % Reduction |
|-------------|-----------------------|-------------|
| Subsample 1 | 0.0029 b <sup>a</sup> | 25.6        |
| Subsample 2 | 0.0031 b              | 25.8        |
| Subsample 3 | 0.0031 b              | 25.8        |
| Control     | 0.0039 a              | —           |

<sup>a</sup>Means within a column followed by the same letter are not significantly different (LSD,  $\alpha = 0.05$ ).

**Supplemental Table 3** Mean total iron reactive phenolics values determined by the Adams–Harbertson assay for three filtered white wines subsamples and an unfiltered control. Time points shown are after bottling. Each individual time point value is an average of two bottle repetitions and three technical repetitions (n = 6).

| Product     | Week 1 | Month 2 | Month 6 | Month 8 |
|-------------|--------|---------|---------|---------|
| Subsample 1 | 87     | 67      | 32      | 29      |
| Subsample 2 | 92     | 71      | 28      | 31      |
| Subsample 3 | 93     | 72      | 28      | 30      |
| Control     | 92     | 69      | 32      | 37      |

## Supplemental Data for:

Buffon, P., H. Heymann, and D.E. Block. 2014.

Sensory and chemical effects of cross-flow filtration on white and red wines.

Am. J. Enol. Vitic. 65:305-314. doi: 10.5344/ajev.2014.13090.

**Supplemental Table 4** Mean polyphenolic components determined by the Adams–Harbertson assay for three filtered red wines subsamples and an unfiltered control. Time points shown are after bottling. Each individual time point value is an average of two bottle repetitions and three technical repetitions (n = 6).

| Product                        | Week 1 | Month 2 | Month 6 | Month 8 |
|--------------------------------|--------|---------|---------|---------|
| <b>Anthocyanin<sup>a</sup></b> |        |         |         |         |
| Subsample1                     | 280    | 275     | 187     | 173     |
| Subsample2                     | 292    | 280     | 192     | 192     |
| Subsample3                     | 295    | 286     | 204     | 186     |
| Control                        | 302    | 283     | 232     | 204     |
| <b>Tannin<sup>b</sup></b>      |        |         |         |         |
| Subsample1                     | 197    | 198     | 251     | 255     |
| Subsample2                     | 255    | 247     | 191     | 328     |
| Subsample3                     | 248    | 246     | 281     | 317     |
| Control                        | 272    | 260     | 349     | 330     |
| <b>NTP<sup>c</sup></b>         |        |         |         |         |
| Subsample1                     | 547    | 547     | 458     | 434     |
| Subsample2                     | 557    | 576     | 495     | 454     |
| Subsample3                     | 555    | 599     | 469     | 468     |
| Control                        | 535    | 592     | 490     | 490     |
| <b>SPP<sup>d</sup></b>         |        |         |         |         |
| Subsample1                     | 2.05   | 2.66    | 3.17    | 2.18    |
| Subsample2                     | 2.11   | 2.73    | 3.05    | 2.43    |
| Subsample3                     | 2.05   | 2.61    | 3.13    | 2.35    |
| Control                        | 2.37   | 2.96    | 3.35    | 2.21    |
| <b>LPP<sup>e</sup></b>         |        |         |         |         |
| Subsample1                     | 0.01   | 0.00    | 0.00    | 0.03    |
| Subsample2                     | 0.06   | 0.00    | 0.00    | 0.00    |
| Subsample3                     | 0.11   | 0.00    | 0.00    | 0.31    |
| Control                        | 0.10   | 0.00    | 0.00    | 0.20    |

<sup>a</sup>Anthocyanin in mg/L malvidin-3-glucoside equivalents.

<sup>b</sup>Tannin in mg/L catechin equivalents.

<sup>c</sup>Nontannin iron reactive phenolics in mg/L catechin equivalents.

<sup>d</sup>Small polymeric pigment in absorbance.

<sup>e</sup>Large polymeric pigment in absorbance.
